# Supplementary material for: Improving the efficiency of polymer solar cells via a treatment of methanol : water on the active layers
Source: Royal Society of Chemistry journal article supplement (doi:10.1039/c6ta04026h), 2016-01-01
Supplement: c6ta04026h1.pdf [file c6ta04026h1.pdf]

## Electronic Supplementary Information

### Improving efficiency of polymer solar cells via a treatment of methanol:water on the active layers

Biao Guo, Weilong Zhou, Mengchun Wu, Junjie Lv, Chengzhuo Yu, Fenghong Li,\* Zhonghan Hu

State Key Laboratory of Supramolecular Structure and Materials, Institute of Theoretical Chemistry, Jilin University, Changchun 130012, P. R. China.

\*E-mail: [fhli@jlu.edu.cn](mailto:fhli@jlu.edu.cn)

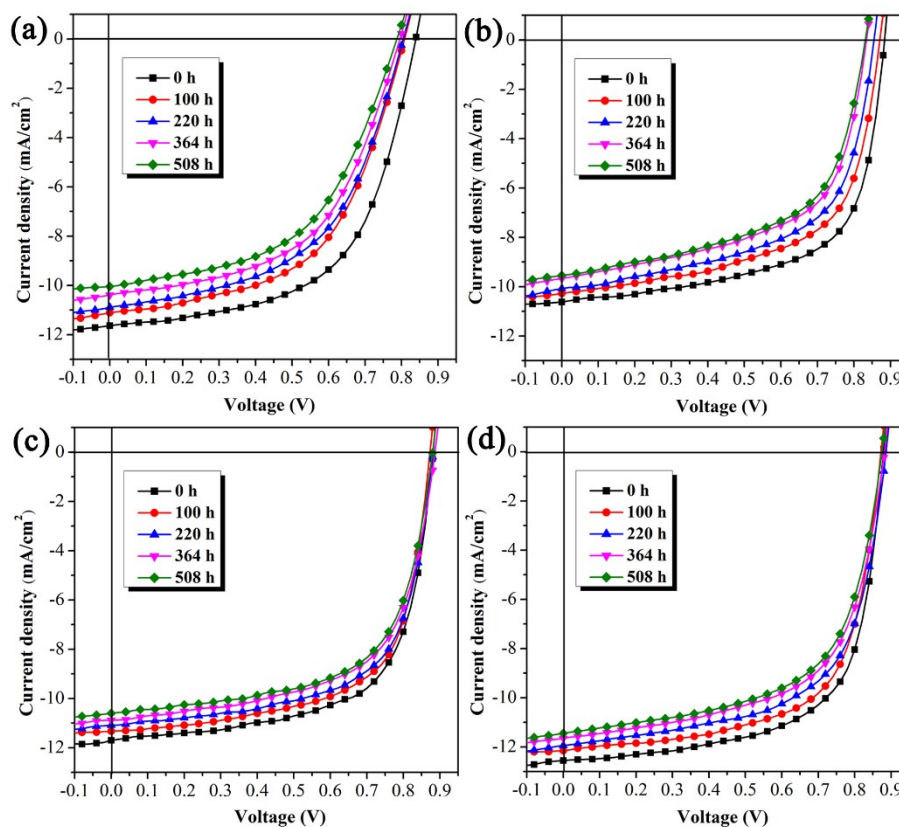

**Fig. S1** *J-V* curves of the encapsulated PSCs based on ITO/PEDOT:PSS/PCDTBT:PC<sub>71</sub>BM/Al (a), ITO/PEDOT:PSS/PCDTBT:PC<sub>71</sub>BM/LiF/Al (b), ITO/PEDOT:PSS/PCDTBT:PC<sub>71</sub>BM/methanol/Al (c) and ITO/PEDOT:PSS/PCDTBT:PC<sub>71</sub>BM/M:W=6:1/Al (d).

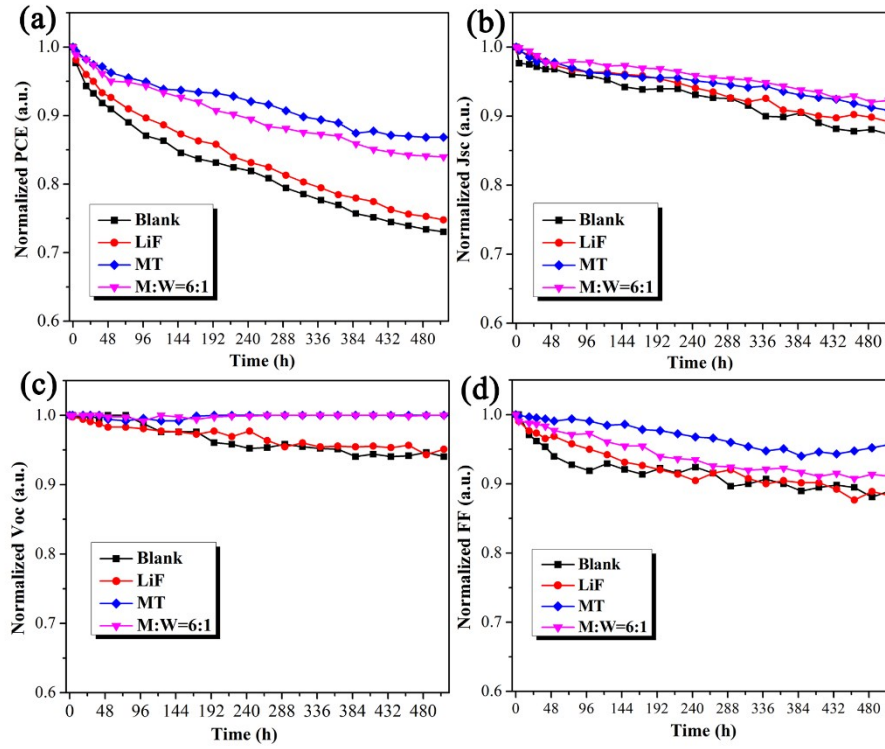

**Fig. S2** Normalized PCE (a), Jsc (b), Voc (c) and FF (d) *versus* time of the encapsulated PSCs. Blank: ITO/PEDOT:PSS/PCDTBT:PC<sub>71</sub>BM/Al; LiF: ITO/PEDOT:PSS/PCDTBT:PC<sub>71</sub>BM/LiF/Al; MT: ITO/PEDOT:PSS/PCDTBT:PC<sub>71</sub>BM/methanol/Al; M:W=6:1: ITO/PEDOT:PSS/PCDTBT:PC<sub>71</sub>BM/M:W=6:1/Al.

**Table S1** Photovoltaic performance of encapsulated the PSCs obtained from Fig. S1.

| interfacial material | PCE (%)        |                | Jsc (mA/ cm <sup>2</sup> ) |                 | Voc (V)        |                | FF             |                |
|----------------------|----------------|----------------|----------------------------|-----------------|----------------|----------------|----------------|----------------|
|                      | initial        | final          | initial                    | final           | Initial        | final          | initial        | final          |
| Blank                | 5.64<br>± 0.23 | 4.12<br>± 0.11 | 11.57<br>± 0.19            | 10.11<br>± 0.13 | 0.84<br>± 0.01 | 0.79<br>± 0.01 | 0.58<br>± 0.01 | 0.52<br>± 0.01 |
| LiF                  | 5.99<br>± 0.14 | 4.48<br>± 0.22 | 10.63<br>± 0.09            | 9.48<br>± 0.11  | 0.88<br>± 0.01 | 0.84<br>± 0.01 | 0.64<br>± 0.01 | 0.57<br>± 0.01 |
| MT                   | 6.69<br>± 0.24 | 5.81<br>± 0.10 | 11.67<br>± 0.04            | 10.60<br>± 0.12 | 0.88<br>± 0.01 | 0.88<br>± 0.01 | 0.65<br>± 0.01 | 0.62<br>± 0.01 |
| M:W=6:1              | 7.24<br>± 0.22 | 6.08<br>± 0.04 | 12.44<br>± 0.15            | 11.48<br>± 0.05 | 0.88<br>± 0.01 | 0.88<br>± 0.01 | 0.66<br>± 0.02 | 0.60 ± 0.01    |

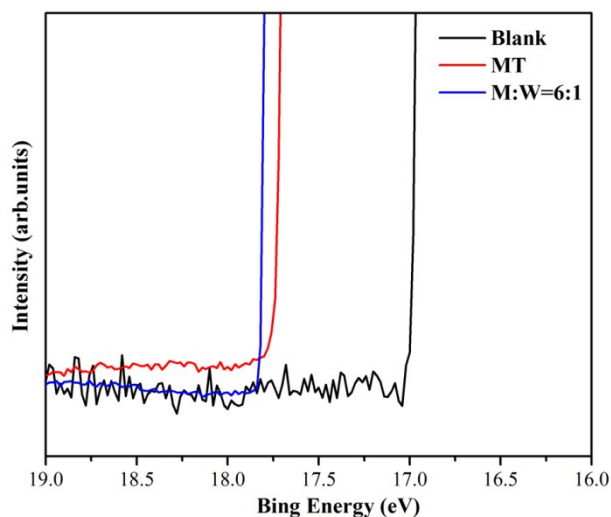

**Fig. S3** Ultraviolet photoelectron spectra of bare Al (black line), Al treated by 100% methanol (red line) and Al treated by M:W=6:1 in the secondary electron cutoff range.

**Table S2** Electron and hole mobilities from electron-only and hole-only devices.

| Active layer treatment | Electron-only devices                                         | Hole-only devices                                             |
|------------------------|---------------------------------------------------------------|---------------------------------------------------------------|
|                        | $\mu_e$<br>[cm <sup>2</sup> V <sup>-1</sup> s <sup>-1</sup> ] | $\mu_h$<br>[cm <sup>2</sup> V <sup>-1</sup> s <sup>-1</sup> ] |
| Blank                  | $2.66 \times 10^{-4}$                                         | $1.77 \times 10^{-5}$                                         |
| MT                     | $3.28 \times 10^{-4}$                                         | $4.03 \times 10^{-5}$                                         |
| M:W=9:1                | $4.50 \times 10^{-4}$                                         | $5.24 \times 10^{-5}$                                         |
| M:W=6:1                | $5.05 \times 10^{-4}$                                         | $6.16 \times 10^{-5}$                                         |
| M:W=3:1                | $4.11 \times 10^{-4}$                                         | $4.92 \times 10^{-5}$                                         |

Electron-only device: ITO/Al/LiF/PCDTBT:PC<sub>71</sub>BM/ST/LiF/Al; Hole-only device: ITO/PEDOT:PSS/PCDTBT:PC<sub>71</sub>BM/ST/MoO<sub>x</sub>/Al (ST : solvent treatment).

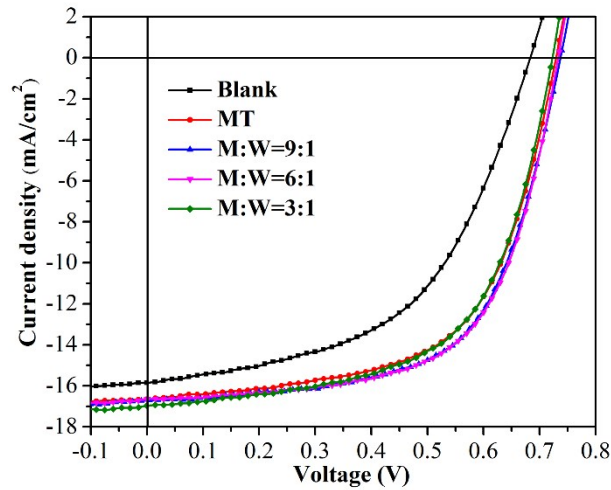

**Fig. S4**  $J$ - $V$  curves of the PSCs based on ITO/PEDOT:PSS/PTB7:PC<sub>71</sub>BM/Al under AM1.5G illumination at intensity of 100 mW cm<sup>-2</sup>.

**Table S3** Performances of the PSCs based on PTB7:PC<sub>71</sub>BM derived from Fig. S4.

| Device <sup>c</sup> | Jsc<br>[mA cm <sup>-2</sup> ] | Voc<br>[V] | FF   | PCE [%] |       | Rs<br>[Ω cm <sup>2</sup> ] | Rsh<br>[Ω cm <sup>2</sup> ] |
|---------------------|-------------------------------|------------|------|---------|-------|----------------------------|-----------------------------|
|                     |                               |            |      | Max.    | Aver. |                            |                             |
| 1                   | 15.76                         | 0.680      | 0.53 | 5.72    | 5.52  | 11.29                      | 330.0                       |
| 2                   | 16.51                         | 0.725      | 0.62 | 7.42    | 7.30  | 7.38                       | 388.1                       |
| 3                   | 16.85                         | 0.735      | 0.63 | 7.80    | 7.48  | 6.50                       | 614.6                       |
| 4                   | 16.56                         | 0.730      | 0.64 | 7.74    | 7.57  | 6.62                       | 611.9                       |
| 5                   | 16.97                         | 0.720      | 0.61 | 7.45    | 7.23  | 6.90                       | 426.6                       |

<sup>c</sup> Device structure: Device 1: [ITO/PEDOT:PSS/PTB7:PC<sub>71</sub>BM/Al], Device 2: [ITO/PEDOT:PSS/PTB7:PC<sub>71</sub>BM/Methanol/Al], Device 3: [ITO/PEDOT:PSS/PTB7:PC<sub>71</sub>BM/M:W=9:1/Al], Device 4: [ITO/PEDOT:PSS/PTB7:PC<sub>71</sub>BM/M:W=6:1/Al], Device 5: [ITO/PEDOT:PSS/PTB7:PC<sub>71</sub>BM/M:W=3:1/Al].
